# Supplementary material for: Alteration of tumor-associated macrophage subtypes mediated by KRT6A in pancreatic ductal adenocarcinoma
Source: publisher site journal article supplement (doi:10.18632/aging.104091), 2020-11-18
Supplement: Supplementary file [file aging-v12i22-104091-supplementary-material-SD1.pdf]

## SUPPLEMENTARY TABLE

**Supplementary Table 1. Multivariate logistic regression analyzing of clinical stage of PDAC patients in TCGA in relation to ITGAM expression, gender, age and survival status.**

| <b>Variables</b>               | <b>OR</b> | <b>%95 CI</b> | <b>p-Value<sup>a</sup></b> |
|--------------------------------|-----------|---------------|----------------------------|
| ITGAM expression (low / high)  | 2.530     | 1.084-5.908   | 0.032                      |
| Gender (male / female)         | 0.661     | 0.292-1.500   | 0.323                      |
| Age ( $\leq 55$ / $> 55$ )     | 1.239     | 0.473-3.245   | 0.662                      |
| Survival status (alive / dead) | 2.334     | 1.017-5.358   | 0.046                      |

<sup>a</sup>Wald test for logistic regression.
